# Supplementary material
Source: PubMed Central journal article supplement (PMC3172701)
Supplement: NIHMS310975-supplement-supplemental.pdf [file NIHMS310975-supplement-supplemental.pdf]

## Supplemental figure legend

**Supplemental FIG. 1. Comparative alignment of the amino-acid sequences of 61 flavivirus NS5 MTases.** The alignments of the 61 sequences of flavivirus MTases were performed using MultAlin Web server (Corpet, 1988). Residue number is according to the WNV sequence. Invariant amino acids appear in the grey-shaded columns, with a red-colored font. Residues are colored according to the extent of their sequence conservation: >85% conserved (red); 70-85% conservation (green); 60-70% conservation (magenta); 50-60% conservation (cyan), and not conserved (<50%) (white). Secondary-structural elements in the MTase domains are as has been described for the WNV MTase structure (Zhou et al., 2007). Conserved MTase sequence motifs I–X (Malone et al., 1995), except for motif IX which is conserved only for cytosine-5 DNA MTase (Posfai et al., 1989), are boxed. The positions of four catalytic amino acids conserved among 2'-*O*-MTases are indicated by \* above the sequence. Residues that contact SAM co-factor and GTP are indicated by "+" and "-" above the sequence, respectively. For better readability, residues that are the same as WNV's have been indicated by dots. All virus abbreviations used in the alignment are those of the International Committee on Taxonomy of Viruses: (1) **mosquito-borne flaviviruses:** West Nile virus (WNV), Usutu virus (USUV), Murray Valley encephalitis virus (MVEV), Japanese encephalitis virus (JEV), St. Louis encephalitis virus (SLEV), Bagaza virus (BAGV), Ilheus virus (ILHV), Aroa virus (AROAV), Zika virus (ZIKV), Kedougou virus (KEDV), Dengue virus serotype 1-4 (DENV1-4), Chaoyang virus (CYV), Lammi virus (LAMV), Nounané virus (NOUV), Barkedji virus (BKV), Yokose virus (YOKV), Sepik virus (SEPV), Wesselsbron virus

(WESSV), Yellow fever virus (YFV), Banzi virus (BANV), Uganda virus (UGSV), Jugra virus (JUGV), Saboya virus (SABV), Potiskum virus (POTV), Bouboui virus (BOUV), Edge Hill virus (EHV), Kokobera virus (KOKV); (2) **tick-borne flaviviruses:** Western, Siberian, and Far Eastern subtypes of the tick-borne encephalitis virus (WTBEV, STBEV, FETBEV), Loupig ill virus (LIV), Spanish sheep encephalitis virus (SSEV), Turkish sheep encephalitis virus (TSEV), Greek goat encephalitis virus (GGEV), Omsk hemorrhagic fever virus (OHFV), Langat virus (LGTV), Alkhurma hemorrhagic fever virus (AHFV), Kyasanur Forest disease virus (KFDV), Powassan virus (POWV), Karshi virus (KSIV), Royal Farm virus (RFV), Gadgets Gully virus (GGYV), Kadam virus (KADV), Meaban virus (MEAV), Saumarez Reef virus (SREV), Tyuleniy virus (TYUV); (3) **flaviviruses with no known arthropod vector:** Entebbe bat virus (ENTV), Montana myotis leukoencephalitis virus (MMLV), Rio Bravo virus (RBV), Modoc virus (MODV), Apoi virus (APOIV), Cell fusing agent virus (CFAV), Kamiti River virus (KRV), Aedes flavivirus (AEFV), Culex flavivirus (CFV), Quang Binh virus (QBV), Nakiwogo virus (NAKV), Tamana bat virus (TABV).





$\beta 2$   $\alpha B$   $\beta 3$   $\beta 4$   $\alpha D$   $\beta 5$

95 100 110 120 130 140 150 160 170 180

WNV KRVQEVGRG YTKGGP - GHEE PQLVQSYGWNIVITM KSGVDVYRYPSECDTLLCDIGESS SSSAEVEEHRTIRVLEMEVDWLHRGP R - EFCVKVLCPY

USUV . G . . . . . M . M . . . . . Y . K . . . . . F . . . . . Q . L . I . . . . . S . Q . . . . . - . . . . . I

MVFV . N . . . . . - . . . . . M . M . . . . . . . . . . . K . . . . . IS . . . . . P . . . . . I . Q . L . I . . . . . S . . . . . S . K . . . . . I . I

JEV . K . . . . . A . . . . . M . M . . . . . R . L . SL . . . . . . . . . . . K . . . . . ES . . . . . F . . . . . P . P . . . . . Q . L . . . . . TS . . . . . - . . . . . I

SLEV . H . . . . . K . F . . . . . - . . . . . M . M . . . . . L . H . . . . . . . . . . . HK . A . EA . V . . . . . NP . C . . . . . A . A . D . . . . . E . KK . AT . . . . . I

BAGV . M . . . . . K . . . . . - . . . . . MMM . . . . . L . SL . . . . . I . I . . . . . A . HS . . . . . . . . . . . A . PVP . I . . . . . A . IK . QT . DE . A . TE . . . . . I

ILHV . RH . . . . . - . . . . . VMM . . . . . . . . . . . K . T . S . . . . . . . . . . . VG . . . . . A . L . D . . . . . P . - . . . . AN . S . I

AROAV . Q . . . . . . . . . . . RM . . . . . . . . . . . L . . . . . H . A . VG . I . . . . . . . . . . ATP . . . . . A . IK . . . . . P . KNN . . . . . - . . . . . I

ZIKV . RK . . . . . - . . . . . M . . . . . RL . . . . . . . . . . . HMAA . E . . . . . . . . . . P . . . . . T . L . S . G . . . . . EKR . G . A . I

KEDV . K . H . A . F . . . . . - . . . . . IM . . . . . R . . . . . I . H . L . VOHA . . . . . . . . . . . NPG . . . . . A . IK . . . . . L . N . IKP . T . - . . . . S . F

KOKV . E . K . K . . . . . R . . . . . V . T . . . . . Q . . . . . . . . . . . KEA . E . VV . . . . . C . . . . . PA . AD . ST . K . . . . . LA . R . E . ND . GAD . I

DENV1 . K . T . K . . . . . - . . . . . IPMAT . . . . . L . KLY . K . . . . . ET . P . K . . . . . . . . . . PNPTI . . . . . G . L . . . . . K . . . . . P . RGN . - . . . . Q . I . N

DENV2 . N . R . K . L . . . . . - . . . . . IPMST . . . . . L . RLO . . . . . FI . P . K . . . . . . . . . . PNPT . AG . L . . . . . NL . N . NNMT . - . . . . Q . I . N

DENV3 . K . T . . . . . - . . . . . VPMST . . . . . KLM . K . . . . . L . P . K . . . . . . . . . . P . PT . . . . . S . . . . . K . . . . . P . KNN . - . . . . Q . I . N

DENV4 . N . T . K . . . . . - . . . . . IPMAT . . . . . L . KLH . . . . . . . . . . . K . T . QV . . . . . . . . . . NPTI . . . . . G . L . . . . . K . . . . . P . SSK . - . . . . I . N

CYV . RN . VS . . . . . F . . . . . D . . . . . IP . T . . . . . L . R . K . . . . . M . THMT . . . . . . . . . . NML . . . . . E . L . . . . . NLF . E . IRKSKPTH . C . A

LAMV . RN . TS . . . . . F . . . . . E . . . . . MP . . . . . L . R . K . . . . . M . THMT . V . . . . . . . . . . NML . . . . . E . L . . . . . N . F . E . RKA . PTHY . C . I . A

NOUV . RK . RS . QA . . . . . F . . . . . . . . . . . KM . KN . . . . . LINF . . . . . NTN . MWLETK . . . . . M . . . . . . . . . . DPYI . . . . . E . IK . V . . . . . F . R . KE . Q . P . VC . I . .

BKV . A . TC . KAF . V . . . . . W . . . . . L . MVRPN . . . . . LIQF . . . . . KC . HWLATO . . . . . M . . . . . . . . . . ATDPKI . . . . . G . L . . . . . DTF . K . KERK . P . VC

YOKV . N . KK . MAF . L . VO . . . . . K . IMRTTL . . . . . LIRF . DKT . . . . . NMEVIG . . . . . . . . . . P . IA . . . . . Q . IK . NCAQ . Q . E . NYT . . . . . I

ENTV . A . KK . LAF . L . TO . . . . . K . LMRTT . . . . . IRF . DR . . . . . TLETIHG . . . . . . . . . . P . IO . . . . . Q . L . MNAK . S . E . RYEN . I

SEFV . E . MS . K . . . . . L . IN . . . . . K . VHM . TL . . . . . IKF . DKS . . . . . TM . A . E . E . . . . . . . . . . NFLI . KD . IK . . . . . NF . R . K . VNT . EN . . . . .

WESSV . E . MS . K . . . . . L . IE . . . . . K . IHM . TL . . . . . KF . DKS . . . . . TM . T . HS . . . . . . . . . . NPL . RD . MK . . . . . NF . R . K . VNT . EN . . . . . A

YFV . E . SG . K . F . L . RD . . . . . K . MN . . . . . L . I . F . DKT . IHRLEPVK . . . . . . . . . . SVT . GE . V . . . . . DT . K . AC . V . DN . . . . . A

BANV . RQ . TS . KA . . . . . L . KE . . . . . K . R . I . . . . . L . IKF . DKS . ITRMTPHAS . . . . . . . . . . NP . KE . L . I . A . KMSPT . - . . . . VS . F . A

UGSV . RL . TS . KA . . . . . L . KT . . . . . R . RMI . L . . . . . IKF . DK . . . . . SRLAPHIS . . . . . . . . . . NP . I . KE . IK . IGIMST . MSPT . NA . F . A

JUGV . RS . SI . . . . . F . L . KN . . . . . S . R . IE . L . . . . . IKF . DKS . OKMEPVTIS . . . . . . . . . . NP . KE . L . I . NMRR . MSPST . SA . F . A

SABV . RL . SS . K . F . L . KA . . . . . T . R . IE . L . . . . . IKF . DKC . GEMQPIAS . . . . . . . . . . NP . I . KE . IK . I . I . RN . MSPT . - . . . . SS . F . A

POTV . RL . SS . K . F . L . KA . . . . . T . R . IE . L . . . . . IKF . DKC . GEMQPIAS . . . . . . . . . . NP . I . KE . IK . I . I . RN . MSPT . - . . . . SS . F . A

BOUV . Q . SS . K . . . . . L . KE . . . . . K . MVI . L . . . . . LIKF . DR . . . . . TRLEV . HS . . . . . . . . . . NP . I . KE . IK . IDL . DK . IPTT . ES . F . A

EHV . . . . . SS . KA . . . . . L . IT . . . . . K . VN . . . . . L . . . . . IKF . DKT . . . . . KMEPHA . E . . . . . . . . . . NPL . ME . IK . IDN . R . MSPT . - . . . . ESY . F . A

LIV . PA . MS . . . . . A . I . R . . . . . V . KM . T . L . . . . . LIRF . R . M . . . . . SMQPHFA . IM . . . . . NPD . A . GE . RK . ISLM . Q . KI . N . AAACVF . A

SSEV . PA . MS . KA . . . . . I . R . . . . . V . KM . T . L . . . . . LIKF . R . M . . . . . SMQPHFA . IM . . . . . NPD . V . GE . R . ILLM . Q . KI . N . TAACVF . A

TSEV . PA . MS . KA . . . . . I . K . . . . . T . RM . T . L . . . . . LIKF . RA . M . . . . . GMQPHFA . IM . . . . . PD . A . GE . R . ILLM . Q . KN . N . TASCVF . A

GGEV . PA . MS . KA . . . . . I . K . . . . . T . KM . T . L . . . . . LIKF . RA . M . . . . . GMQPHFA . IM . . . . . PD . A . GE . R . ILLM . Q . KN . N . TASCVF . A

WTBEV . PA . MS . . . . . A . I . K . . . . . A . KM . T . L . . . . . LIKF . R . M . . . . . SMQPHFA . VM . . . . . PD . A . GE . RK . ILLM . Q . KN . N . TAACVF . A

STBEV . PA . MS . KACAI . . . . . K . . . . . T . KM . T . L . . . . . LIKF . RA . M . . . . . SMQPHFA . IM . . . . . NPD . V . GE . RK . ILLM . Q . KN . N . TATCVF . A . A

FETBEV . PA . MS . KA . . . . . I . K . . . . . T . KM . T . L . . . . . LIKF . RA . M . . . . . SMQPHFA . IM . . . . . NPD . V . GE . RK . ILLM . Q . KN . N . TATCVF . A

OHFV . PA . MG . KA . . . . . I . K . . . . . V . RM . T . L . . . . . LIKF . RA . MN . . . . . TMQPHFA . VM . . . . . PD . AI . GE . RK . ILLM . Q . KN . N . TAACVF . A

LGTV . PA . MS . . . . . A . I . K . . . . . S . RM . T . L . . . . . LIKF . RA . M . . . . . SMEPHFA . AI . . . . . NPD . V . GE . SR . ILLM . Q . KN . N . TATCVF . A

AHFV . PA . MG . KA . . . . . I . K . . . . . V . R . IT . L . . . . . LIKF . RT . M . YSLEAHFA . I . . . . . NPDP . L . GE . SR . ILLM . K . KL . N . DASCVF . A

KFDV . PA . MG . KA . . . . . I . K . . . . . V . R . IT . L . . . . . LIKF . RT . M . YSLEAHFA . I . . . . . PDPLA . GE . SR . ILLM . K . KL . N . DASCVF . A

POWV . PS . MA . . . . . A . I . K . . . . . A . R . T . L . . . . . LIKF . R . M . . . . . SMATTHA . I . . . . . PDP . K . GA . SR . ILLM . Q . KA . N . DAAAVF . A

KSIV . PT . LS . KA . . . . . I . K . . . . . R . M . T . L . . . . . L . KF . R . M . . . . . SMEAHFA . VM . . . . . DPDP . K . GE . SR . IQLMSR . Q . N . DASCVF . A

RFV . PS . MG . KA . . . . . I . R . . . . . R . T . L . . . . . L . KF . R . M . . . . . TMDPHFA . I . . . . . K . GE . SR . IFLM . Q . KM . N . TAACVF . A

GGYV . PS . MA . KA . . . . . I . R . . . . . R . T . L . . . . . LIKF . R . M . . . . . SM . AHRT . I . . . . . CENPAK . AE . SK . IDL . NT . KE . N . TAGCVF . S

KADV . SS . MS . SA . . . . . I . G . . . . . I . RE . . . . . L . RF . R . RI . HTLRPHFA . I . . . . . PNWR . . . . . E . IK . IQLI . N . KALN . AAACVF . A

MEAV . PH . MD . . . . . A . L . VG . . . . . V . RITE . . . . . . . . . . . KF . R . IHTL . V . RT . VIM . V . . . . . PKWS . SE . KI . LL . K . KVKN . SAD . V .

SREV . TK . M . . . . . L . ID . . . . . V . R . E . F . . . . . IKF . K . . . . . RMRP . HV . I . . . . . PKWQI . SE . M . . . . . DLL . K . KAES . AA . V . . . .

TYUV . P . M . LA . L . VG . . . . . S . R . TE . . . . . . . . . . . KF . KT . . . . . GLKVGVE . IM . . . . . PKWQ . SE . . . . . LF . R . KOVN . TA . VI

MMLV . NP . RK . DA . L . YG . . . . . K . R . ETL . . . . . LI . F . AKT . . . . . SLNPYS . . . . . I . . . . . NP . YA . AQ . . . . . IDLM . R . KVN . QAN . F . T

RBV . TP . RK . NA . L . TG . A . K . R . E . L . LI . F . KT . . . . . KLKPPS . . . . . V . . . . . NP . YAT . AKK . LE . I . . . . . GN . MLVN . ESN . F . N

MODV . PN . R . KA . L . TS . . . . . K . R . ETF . . . . . LI . F . K . . . . . RMEPQ . A . V . . . . . NP . T . A . AS . LT . NVISR . EYN . QGGC . . . . . N

APOIV . E . RK . NA . LATTK . Q . . . . . R . . . . . L . F . - . . . . KA . RTIPEYV . . . . . . . . . . SSI . AK . LOIMDV . GK . EIS . GAS . I . I

CFAV . ET . SSAL . F . I . . . . . A . EK . N . . . . . RFVTK . Y . LA . L . T . . . . . HRLTPPF . . . . . IM . . . . . DP . PIK . KT . IK . QLL . N . LVN . GH . VC . I . S

KRV . ES . SS . Y . . . . . V . Q . EK . V . . . . . KFLTK . Y . LTNL . . . . . . . . . . . YRL . PTF . . . . . IM . . . . . DPNPAK . KT . IK . LL . N . SVN . SA . VC . I . S

AEFV . ET . TS . H . F . I . . . . . N . DK . N . . . . . RFVTR . Y . LTSI . P . . . . . YKLEPK . . . . . IM . . . . . DPNLTK . RT . IK . QLL . T . SIN . EQ . VC . S

CFV . T . NS . T . L . L . . . . . A . NR . N . LPFKTK . H . LAVL . A . . . . . YATEPRN . IV . . . . . DPRP . KT . IK . T . L . K . VHN . GAA . C . S

QBV . S . ISA . H . F . L . . . . . N . NR . N . . . . . PFRK . H . LA . L . A . . . . . YAE . PKL . N . IV . . . . . DR . RGD . RT . IK . GLL . K . EHN . NAA . AC . S

NAKV . H . A . K . F . L . . . . . N . NR . N . . . . . PF . TK . Y . LANL . A . . . . . HALKPPS . N . II . . . . . DARPD . RT . MK . NLL . Q . NEN . GAA . C . S

TABV . . . . . P . AKIL . . . . . I . KD . K . HT . D . NGKKVYK . - . . . . KFNWEIGDLFKKRIF . . . . . FVM . . . . . HPNQ . I . AIGDLKR . NWFKENVDCK . - . . . . NW . I . IMV . T



|        | αE               |          |          |           | β6        |         | β7     |          | A4               |        | B2      |          |           |
|--------|------------------|----------|----------|-----------|-----------|---------|--------|----------|------------------|--------|---------|----------|-----------|
|        | ○○○○○○○○○○○○○○○○ |          |          |           | →         |         | →      |          | ○○○○○○○○○○○○○○○○ |        | →       |          |           |
|        | VII              | VIII     |          |           |           |         |        |          |                  |        |         |          |           |
|        | 190              | 200      | 210      | 220       | 230       | 240     | 250    | 260      |                  |        |         |          |           |
| WNV    | MPKVI            | EKMELLQ  | RRYGGGLV | RNPLSRNST | EMYVWSRAS | --GNV   | VHSVNM | TSQVLLGR | MEKRTW           | -KGPQY | EEDVNL  | SGSGTR   |           |
| USUV   | .R.M             | RL.V.    | .V.      | .N.       | .G.A--    | I.A.    | .I.    | .I.      | .D.KI            | -.     | .K.     | .I.      |           |
| MVEV   | .L.S.            | .F.      | .V.      | .N.       | .G.--     | I.A.    | .I.    | .I.      | .D.KI            | -.     | .K.     | .I.      |           |
| JEV    | .V.              | .F.      | .L.      | .N.       | .G.A--    | .A.     | .I.    | .I.      | .DRTV            | -R.    | .K.     | .I.      |           |
| SLEV   | T.I.             | L.K.     | K.       | .V.       | .G.A--    | II.A.S. | .M.    | .M.      | .D.QNR           | -S.    | .R.     | .I.      |           |
| BAGV   | .R.L             | KEELRM   | SW.      | .V.       | .N.       | .G.--   | ITNA   | TV.M     | IN               | NRTNR  | -N.K.   | .H.      |           |
| ILHV   | T.               | RL.R.    | A.       | .V.       | .G.--     | S.IINA  | TV.    | I.VQ     | .N.GCR           | -H.R.  | .C.     | .I.      |           |
| AROAV  | R.               | RLSA.    | T.       | .V.       | .T        | GTA--   | IINA   | L.K.     | H.               | .K.-   | -I.R.   | .K.      |           |
| ZIKV   | TSTM             | T.R.     | .H.      | .V.       | .C.       | .G.K--  | S.IIK. | ST.      | L.               | .DGP   | -R.RPVK | .I.      |           |
| KEDV   | .L.L             | S.NF.    | .C.      | .Y.       | .GK--     | S.M     | SA.T.  | L.VS     | F.RMAG           | -K.RM  | P.LM.   | .T.      |           |
| KOKV   | .E.V             | LSK.L    | .C.      | .I.       | .GYK--    | LIGVI   | S.AL   | R.       | .IK-F            | -AE.R. | .SC     | .I.      |           |
| DENV1  | .S.V             | TL.QM    | .KH.M    | .I.       | .CGT--    | I.SA.   | .RM.   | N        | .FTMA            | -H.RK  | T.R.    | .D.A     |           |
| DENV2  | .S.              | .A.      | .K.A     | .I.       | .N.--     | I.S.    | .I     | RM       | IN               | FTM.   | -Y.KAT  | .P.D     |           |
| DENV3  | .T.              | HL.R.    | KH.M     | .I.       | .I        | NGT--   | I.S.   | V        | RL               | N      | FTMT    | -H.RR    | .TI.K.D.A |
| DENV4  | .T.              | EL.K.    | .KH.N    | .C.       | .G.--     | I.S.    | .T     | KM       | N                | FTT.   | -H.RK   | T.K.D.A  |           |
| CYV    | .N.L             | IDK.MKVH | .A.V     | .I.       | .D.R--    | AMNA    | ASL    | RT       | D                | .IHL   | G.-     | -VHW     | .D.T      |
| LAMV   | .A.L             | LDK.MKIH | .A.V     | .I.       | .D.R--    | AMNA    | SSL    | RT       | D                | .IHS   | G.-     | -VRW     | .D.T      |
| NOUV   | G.RIM            | LDKC     | KI.      | .V.F      | .E.K--    | HSAI    | AL     | AS       | MR               | FDH    | -H      | -ERTHMKD | .IMNT     |
| BKV    | .N               | MMRI     | .R.K.    | .V.F      | .G.R--    | HTATSEL | .K.    | .K.      | GS               | -R     | -L      | IMKD     | .IH.D     |
| YOKV   | T.LIM            | ELSR     | .LKH     | .V        | .GTR--    | TD      | GT     | SNV      | RL               | TR     | LNKPQ   | -P       | .TL.D.I   |
| ENTV   | T.LM             | E.AR     | .VF      | .V        | .GTR--    | TD      | GA     | NV       | R                | MR     | LNKPQ   | -P       | .VI.T     |
| SEPV   | H.D.             | .L       | RM.L     | F.        | .YI       | G.R--   | N      | IT       | M.T              | RS     | R       | FRP      | G.-       |
| WESSV  | H.D.             | .L       | R.L      | F.        | .YI       | G.R--   | N      | IT       | M.T              | RS     | R       | TRPSG    | -         |
| YFV    | .D.L             | .L       | .F       | .TVI      | .Y        | G.R--   | S      | TFT      | Q                | RL     | MR      | RRP      | G.-       |
| BANV   | K.D.             | .AL      | RF       | .LKH      | .I        | .Y      | .Y     | GVR      | -N               | IL     | M.S.    | RM       | MR        |
| UGSV   | K.E.             | .AL      | KE       | .LKH      | .I        | .F      | .F     | GIR      | -N               | IL     | M.S.    | KM       | MR        |
| JUGV   | K.E.             | .AL      | SF       | .LT       | .I        | .F      | .Y     | GVR      | -N               | IT     | M.S.    | KM       | R         |
| SABV   | K.E.             | .AL      | SF       | .LSH      | .I        | .F      | .F     | GIR      | -N               | IT     | M.S.    | RM       | R         |
| POTV   | K.E.             | .AL      | SF       | .LS       | .I        | .F      | .F     | GIR      | -N               | IT     | M.S.    | RM       | R         |
| BOUV   | KSD              | RL       | RF       | .LKH      | .V        | .Y      | .S     | F        | GIR              | -N     | IL      | M.SI     | RL        |
| EHV    | R.E.             | RL       | RF       | .LK       | .I        | .V      | .F     | .Y       | GVK              | -N     | LT      | M.SCV    | RL        |
| LIV    | R.E.             | .AL      | HRE      | .LQW      | .T        | .F      | .Y     | STAVT    | --               | I      | N.      | IQ       | RK        |
| SSEV   | R.E.             | .AL      | HRE      | .LQW      | .T        | .F      | .Y     | STAVT    | --               | I      | N.      | IQ       | RK        |
| TSEV   | R.E.             | .AL      | HRE      | .LQW      | .T        | .F      | .Y     | STAIT    | --               | I      | N.      | IQ       | RK        |
| GGEV   | R.E.             | .AL      | HRE      | .LQW      | .T        | .F      | .Y     | STAIT    | --               | I      | N.      | IQ       | RK        |
| WTBEV  | R.E.             | .AL      | HRE      | .LQW      | .T        | .F      | .Y     | STAVT    | --               | I      | N.      | VQ       | RK        |
| STBEV  | R.E.             | T        | .AL      | HRE       | .LQW      | .T      | .F     | .Y       | STAIT            | --     | I       | N.       | IQ        |
| FETBEV | R.E.             | .AL      | HRE      | .LQW      | .T        | .F      | .Y     | STAVT    | --               | I      | N.      | IQ       | RK        |
| OHFV   | R.E.             | .AL      | HRE      | .LQW      | .T        | .F      | .Y     | STAI     | --               | I      | N.      | VQ       | RK        |
| LGTV   | R.E.             | .AL      | HRE      | .LQW      | .T        | .F      | .Y     | F        | STAIT            | --     | I       | N.       | IQ        |
| AHFV   | R.E.             | L        | .AL      | HRE       | .LQW      | .V      | .F     | .F       | STAV             | --     | I       | N.       | IQ        |
| KFDV   | R.E.             | L        | .AL      | HRE       | .LQW      | .V      | .F     | .F       | STAI             | --     | I       | N.       | TQ        |
| POWV   | R.E.             | L        | .AL      | HRE       | .LQW      | .V      | .F     | .Y       | STAVT            | --     | L       | N.       | VL        |
| KSIV   | R.D.             | .AL      | HRE      | .LLW      | .F        | .Y      | .T     | YTGVC    | --               | I      | I       | N.A      | V         |
| RFV    | R.E.             | .AL      | HRE      | .LQW      | .V        | .F      | .Y     | STAV     | --               | L      | N.A     | V        | TKR       |
| GGYV   | R.D.             | .AL      | HRE      | .LKW      | .V        | .F      | .Y     | YTAVA    | --               | I      | N.A     | I        | Q         |
| KADV   | G.S.V            | .AL      | HRE      | .LKW      | .V        | .F      | .Y     | YSTALA   | --               | A      | V       | G.A      | TKR       |
| MEAV   | SVE              | M        | RLSVM    | .KW       | .Y        | .F      | .T     | .G--     | I                | I      | G.A     | TACTER   | .AR       |
| SREV   | SAE              | M        | RLSAM    | .W        | .F        | .Y      | .T     | .G--     | I                | G.     | TACTER  | .AR      | SDG       |
| TYUV   | S.D.M            | .LSV     | .QW      | .C        | F         | S       | .Y     | .T       | .A--             | G      | A       | TACTER   | .SR       |
| MMLV   | TGN              | L        | RHSF     | T.F       | .V        | .I      | .F     | .GIT     | --               | N      | L       | G.       | AV        |
| RBV    | S.Q              | L        | RLTKF    | HMF       | .II       | .V      | .H     | .F       | .GIT             | --     | N       | L        | G.        |
| MODV   | SCD              | L        | ALMKM    | .F        | .I        | .V      | .I     | .F       | .GIK             | --     | N       | IMGN     | TAV       |
| APOIV  | N.E.             | .H       | LSRW     | HQF       | .V        | .H      | .F     | .GGG     | --               | L      | M.S     | ITAVT    | TQ        |
| CFAV   | SLE              | LR       | I.S.     | HL        | N.R.      | .LSH    | .SV    | .YI      | G.R--            | S      | .RTTY   | .LAA     | MA        |
| KRV    | SLE              | LR       | I.T.     | QKH       | R.        | .LTY    | .A     | .Y       | GSR              | --     | S       | A        | RD        |
| AEFV   | SLE              | LR       | V.S.     | QK        | K.K.      | .LAH    | .A     | .YI      | GNR              | --     | S       | A        | RD        |
| CFV    | HLE              | LR       | L.M.     | HKHN      | K.        | .LS     | .A     | .YI      | GPR              | --     | A       | I        | G.        |
| QBV    | HIE              | LR       | L.T.     | HK        | .RV       | .LSY    | .A     | .YI      | GVR              | --     | A       | I        | G.        |
| NAKV   | HLE              | LR       | L.A.     | HK        | .D.R.     | .LSY    | .A     | .YI      | GKR              | --     | T       | I        | AA        |
| TABV   | HEQ              | L        | HALPK    | ----      | .ST       | .I      | .W     | .L       | .C               | PGS    | NEP     | .RM      | SN        |
